# Supplementary material
Source: publisher site journal article supplement (https://www.dovepress.com/article/325891)

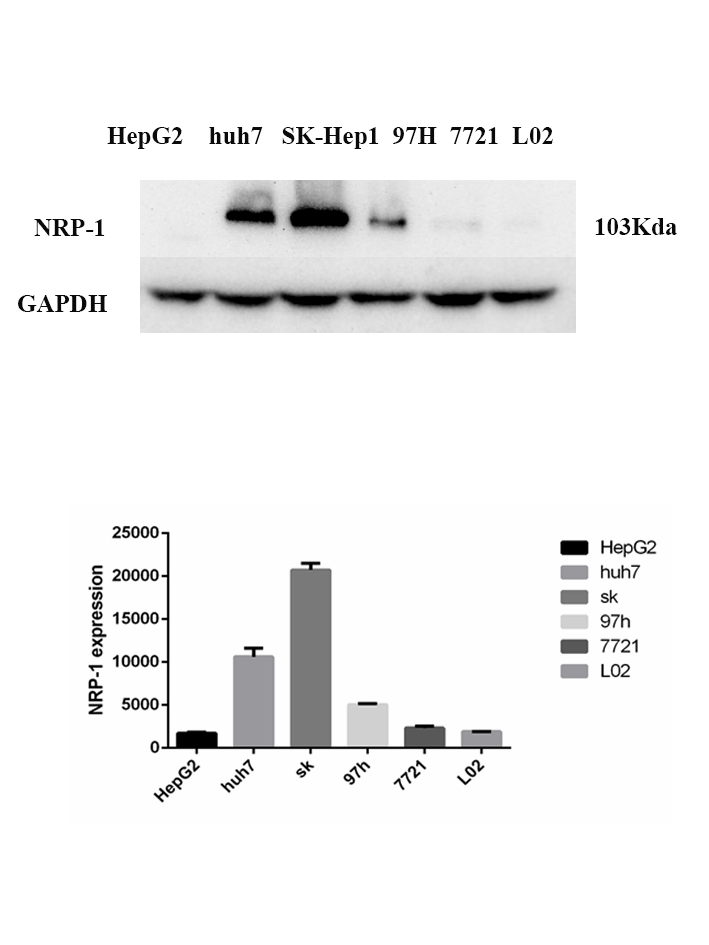


Fig S1 Expression of NPR-1 receptor in different hepatoma cell lines by WB

Supplement: Supplementary file 1 [file get_supplementary_file.php]
